# Supplementary material for: Histone ChIP‐Seq identifies differential enhancer usage during chondrogenesis as critical for defining cell‐type specificity
Source: PubMed Central journal article supplement (PMC7187454; doi:10.1096/fj.201902061rr), 2020-02-14
Supplement: FSB2-34-5317-s001.pdf [file FSB2-34-5317-s001.pdf]

## Supplementary Figures

Fig. S1- Expression of chondrogenic markers from day 0 to day 14 of chondrogenesis.

Fig S2 – Frequency of chromatin state changes in hMSCs to chondrocytes.

Fig S3 - S17 - GO terms associated with genes linked to chondrocyte chromatin states

Fig. S18 - Equivalent chromatin states between Roadmap 18 state model and our 16 state model

Fig. S19 – Heatmaps of Jaccard similarity of cell types between equivalent chromatin states generated in this study and the Roadmap Epigenomics project.

Figure S20 – Methylation in the six enhancer regions selected for luciferase reporter assays.

Fig. S21 – Relative SOX9 enrichment in new enhancers compared to constant enhancers

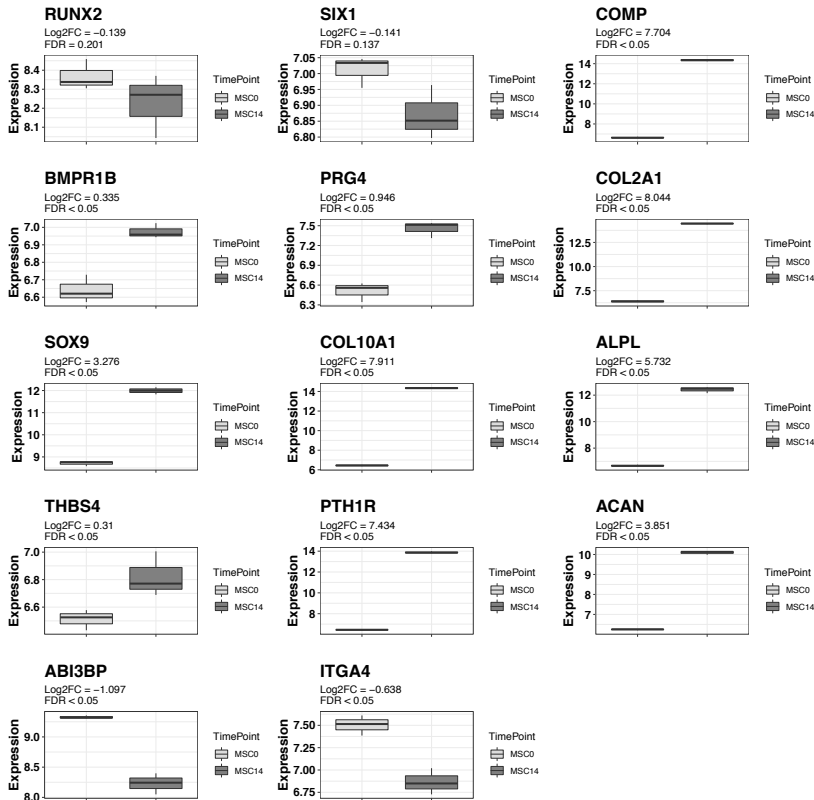

Supplementary Fig. S1 – Expression of chondrogenic markers from day 0 to day 14 of chondrogenesis. General chondrocyte markers: COMP, ACAN. Articular chondrocyte markers: COL2A1, SOX9, SIX1, PRG4, BMPR1B, ABI3BP. Hypertrophic/growth plate chondrocyte markers: ITGA4, ALPL, COL10A1, RUNX2, PTH1R

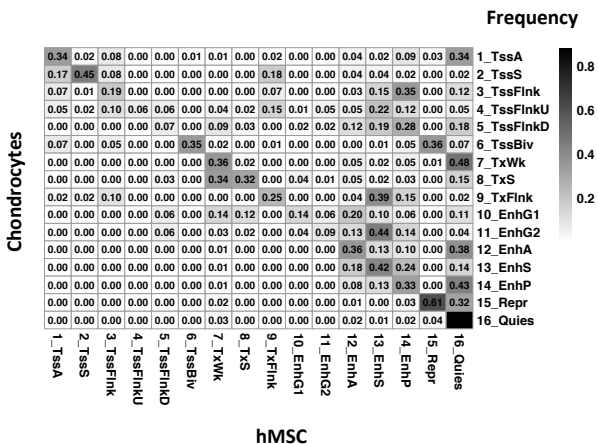

Supplementary Fig. S2 – Frequency of chromatin state changes in hMSCs to chondrocytes. The y axis shows the chondrocyte chromatin state and the x axis shows what state it was prior to chondrogenesis.

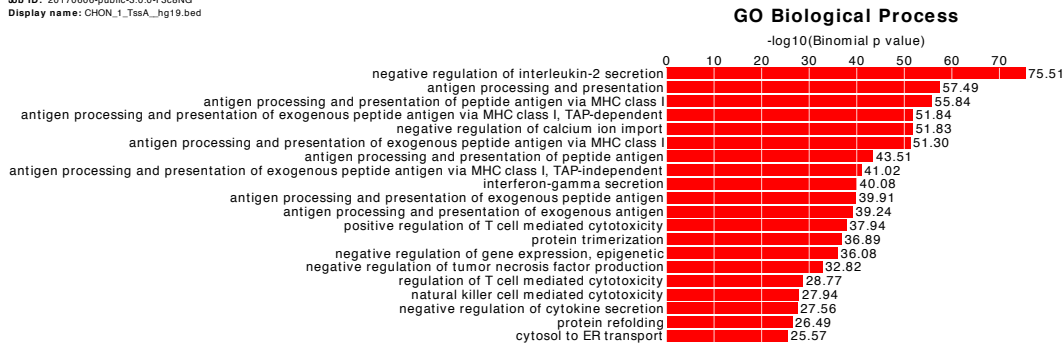

Figure S3 - GREAT GO terms for chondrocyte chromatin state 1\_TssA

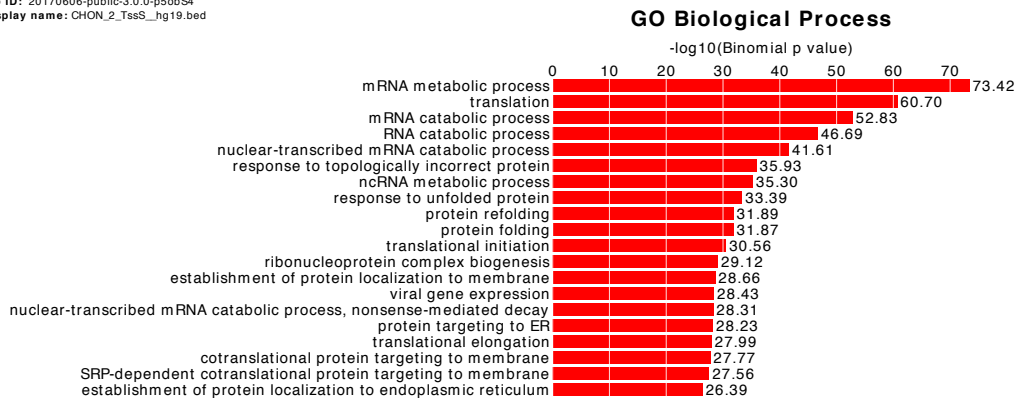

Figure S4 - GREAT GO terms for chondrocyte chromatin state 2\_TssS

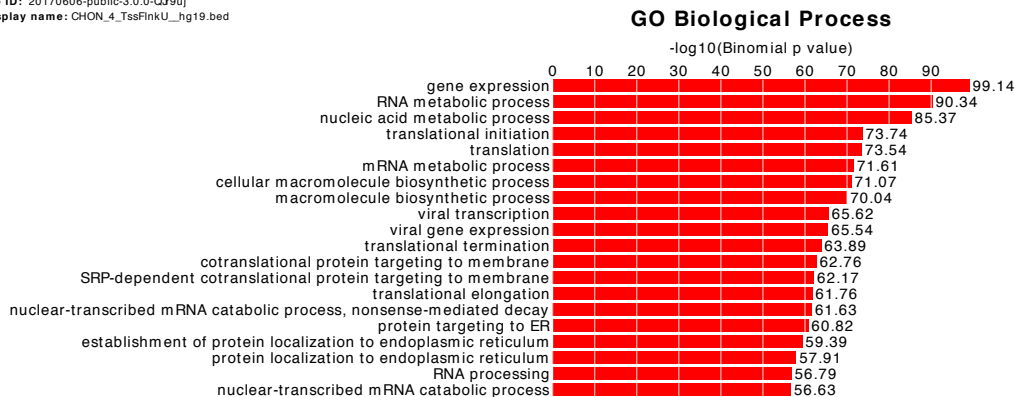

Figure S5 - GREAT GO terms for chondrocyte chromatin state 3\_TssFlnk

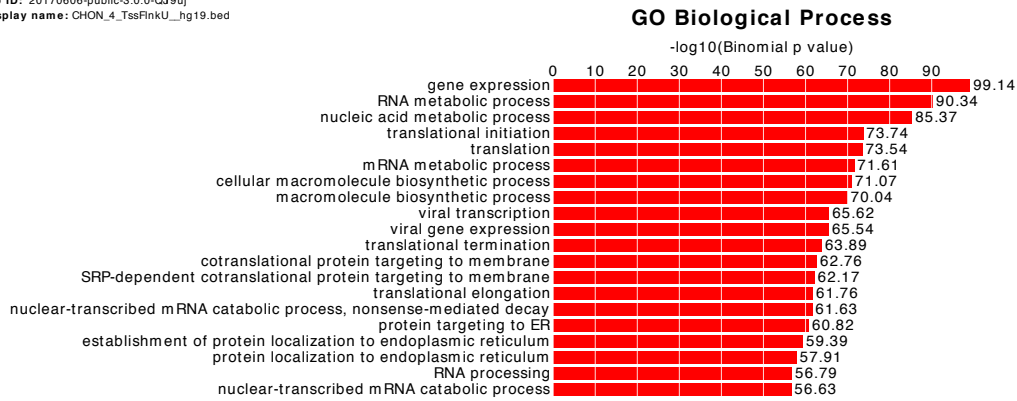

Figure S6 - GREAT GO terms for chondrocyte chromatin state 4\_TssFlnkU

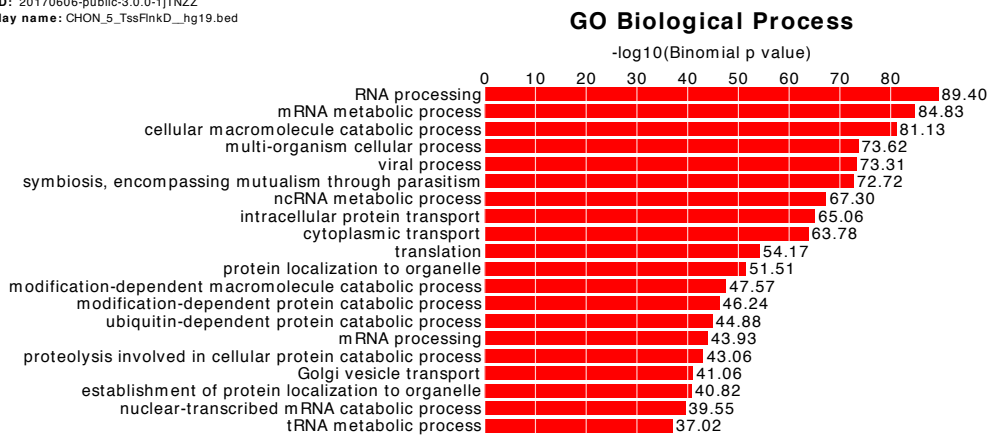

Figure S7 - GREAT GO terms for chondrocyte chromatin state 5\_TssFlnkD

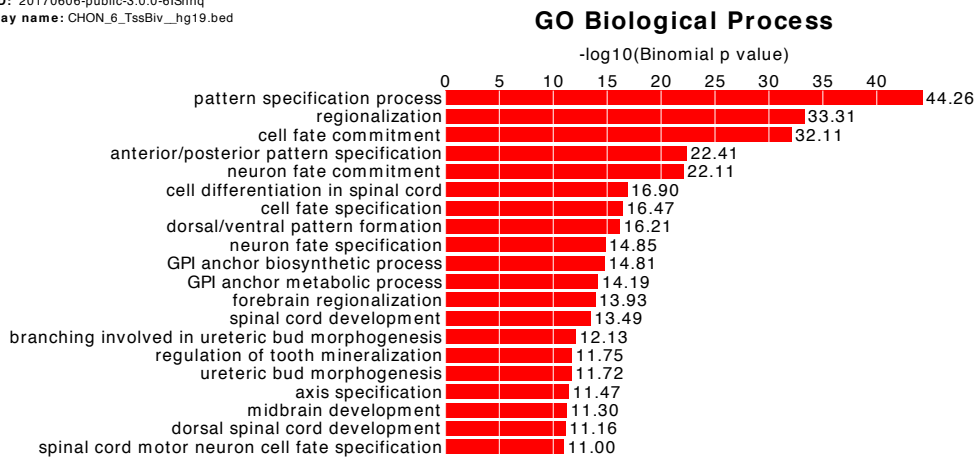

Figure S8 - GREAT GO terms for chondrocyte chromatin state 6\_TssBiv

Job ID: 20170606-public-3.0.0-35s1sO  
 Display name: user-provided data

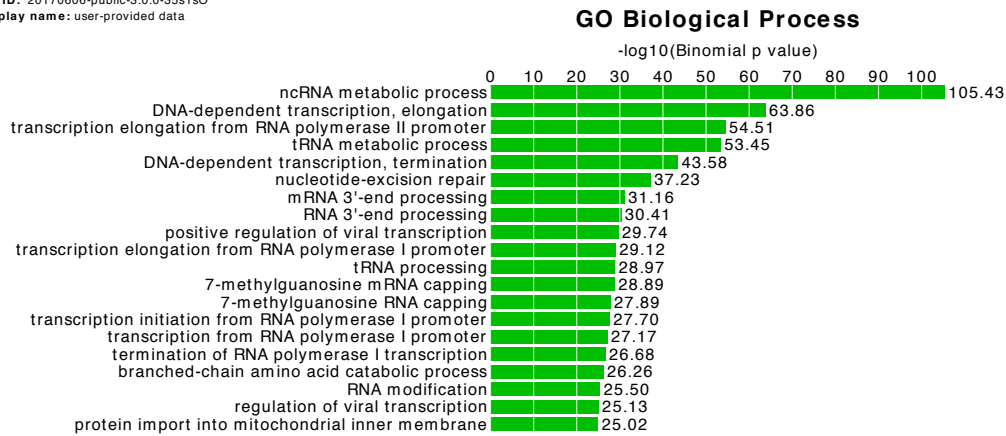

Figure S9 - GREAT GO terms for chondrocyte chromatin state 7\_TxWk

Job ID: 20170606-public-3.0.0-qrmFxFU  
 Display name: CHON\_8\_TxS\_hg19.bed

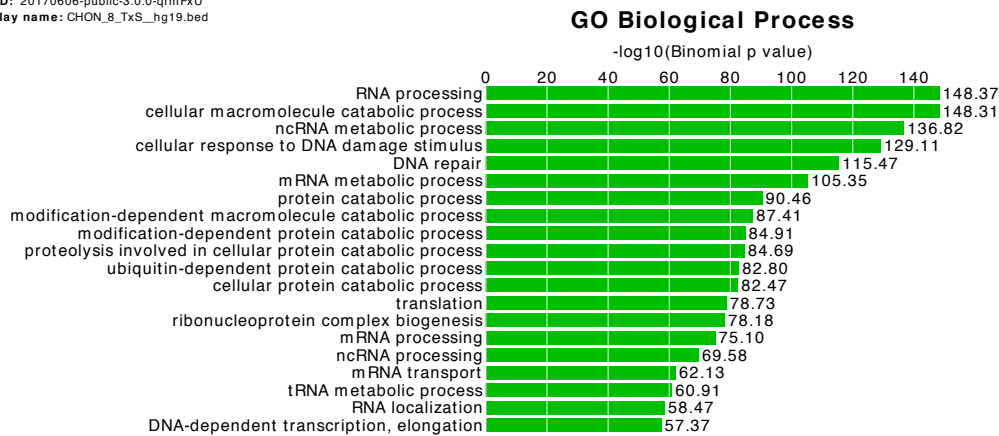

Figure S10 - GREAT GO terms for chondrocyte chromatin state 8\_TxS

Job ID: 20170606-public-3.0.0-0IVQk9  
 Display name: CHON\_9\_TxFlnk\_hg19.bed

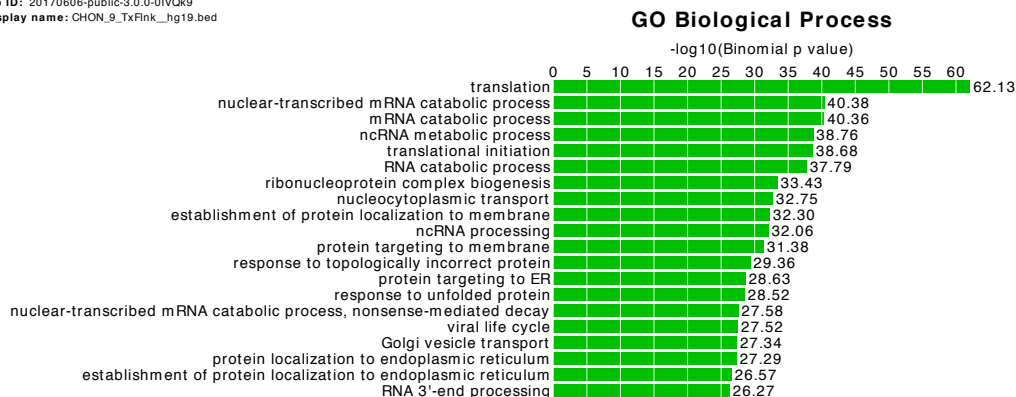

Figure S11 - GREAT GO terms for chondrocyte chromatin state 9\_TxFlnk

Job ID: 20170607-public-3.0.0-9Vu1dI  
 Display name: CHON\_10\_EnhG1\_hg19.bed

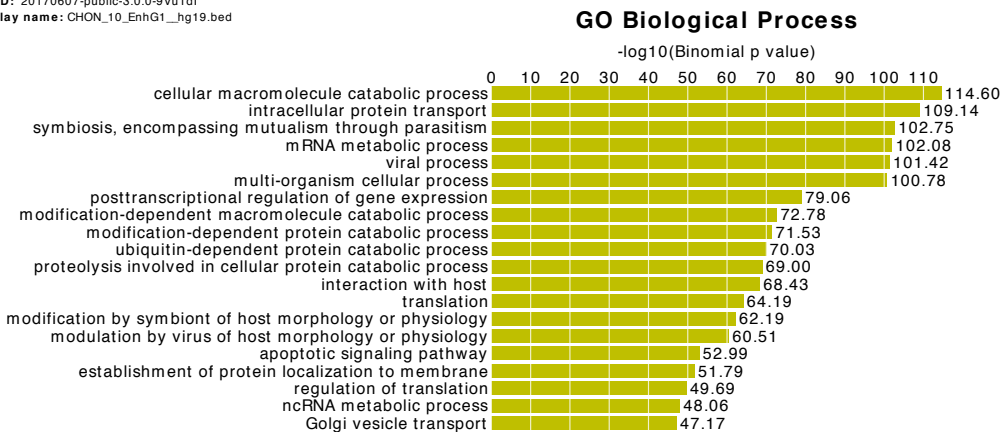

Figure S12 - GREAT GO terms for chondrocyte chromatin state 10\_EnhG1

Job ID: 20170607-public-3.0.0-3110EB  
 Display name: user-provided data

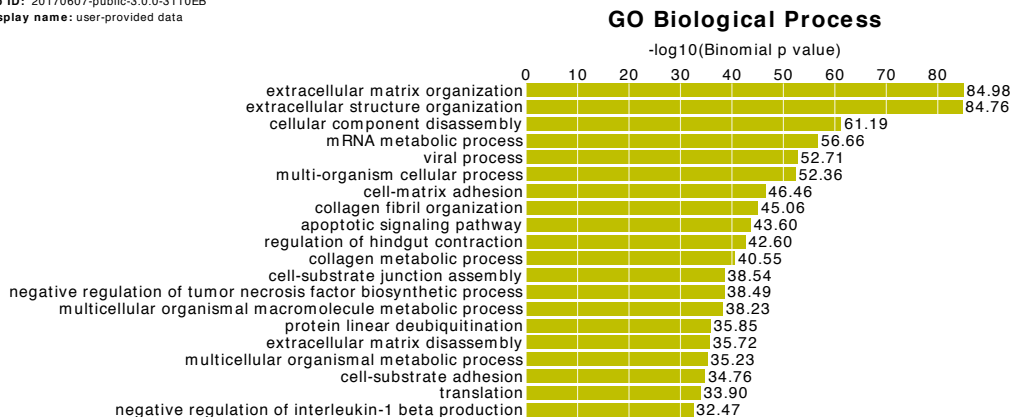

Figure S13 - GREAT GO terms for chondrocyte chromatin state 11\_EnhG1

Job ID: 20170607-public-3.0.0-46HwdS  
 Display name: user-provided data

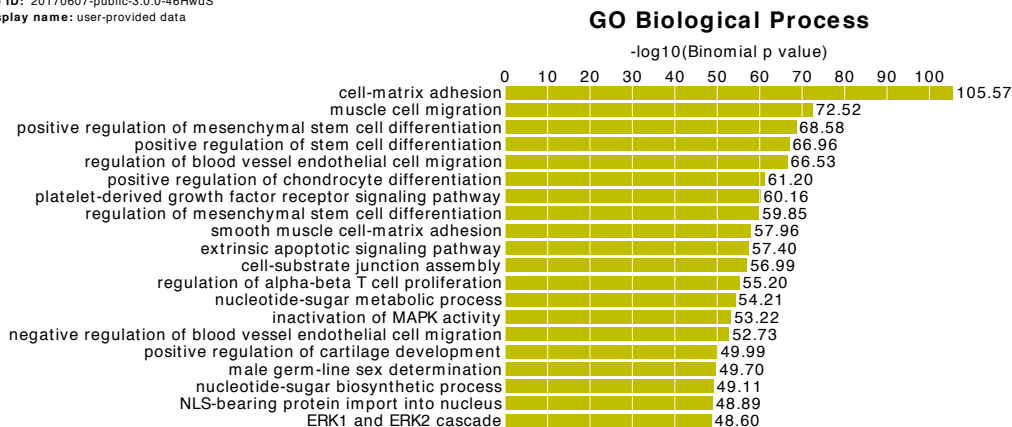

Figure S14 - GREAT GO terms for chondrocyte chromatin state 12\_EnhA

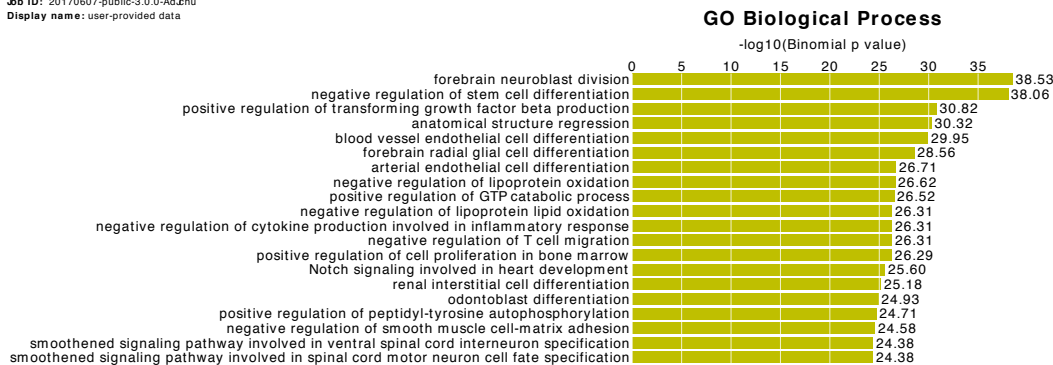

Figure S15 - GREAT GO terms for chondrocyte chromatin state 14\_EnhP

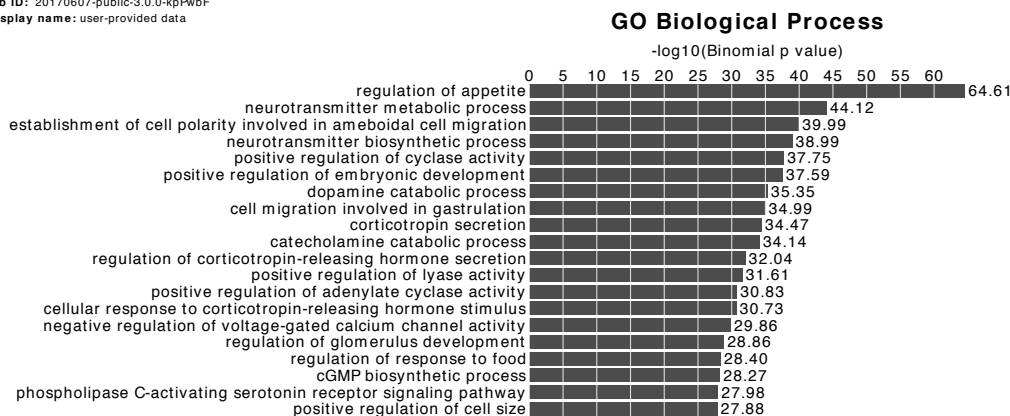

Figure S16 - GREAT GO terms for chondrocyte chromatin state 15\_Repr

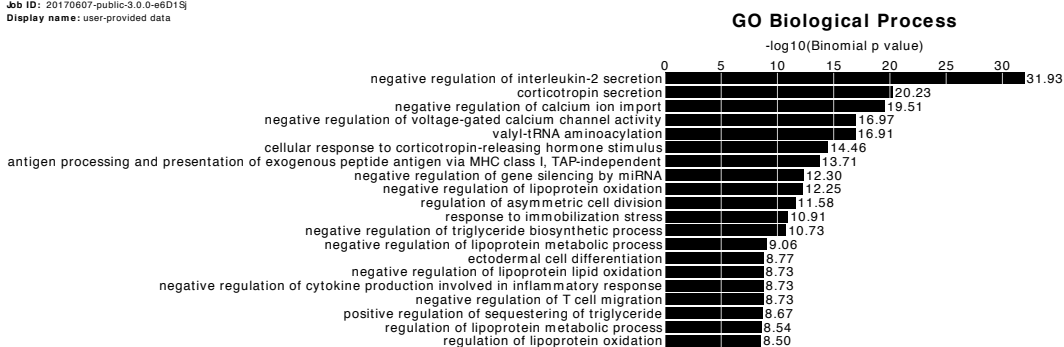

Figure S17 - GREAT GO terms for chondrocyte chromatin state 16\_Quies

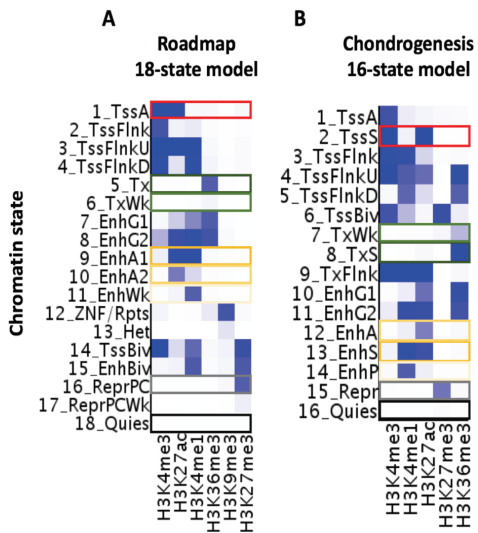

Figure S18 - ChromHMM emission parameters for Roadmap's 18 state model (A) and (B) chondrogenesis 16 state model. Roadmap's 1\_TssA state and the chondrogenesis 2\_TssS state comprises equal probabilities of H3K4me3 and H3K27ac histone marks. Likewise, Roadmap's 9\_EnhA1 and chondrogenesis 13\_EnhS have similar levels of H3K4me1 and H3K27ac. Other states considered comparable were Roadmap's 5\_Tx with chondrogenesis 8\_TxS, Roadmap's 6\_TxWk with chondrogenesis 7\_TxWk, Roadmap's 11\_EnhWk with chondrogenesis 14\_EnhP, Roadmap's 16\_ReprPC with chondrogenesis 15\_Repr and Roadmap's 18\_Quies with chondrogenesis 16\_Quies

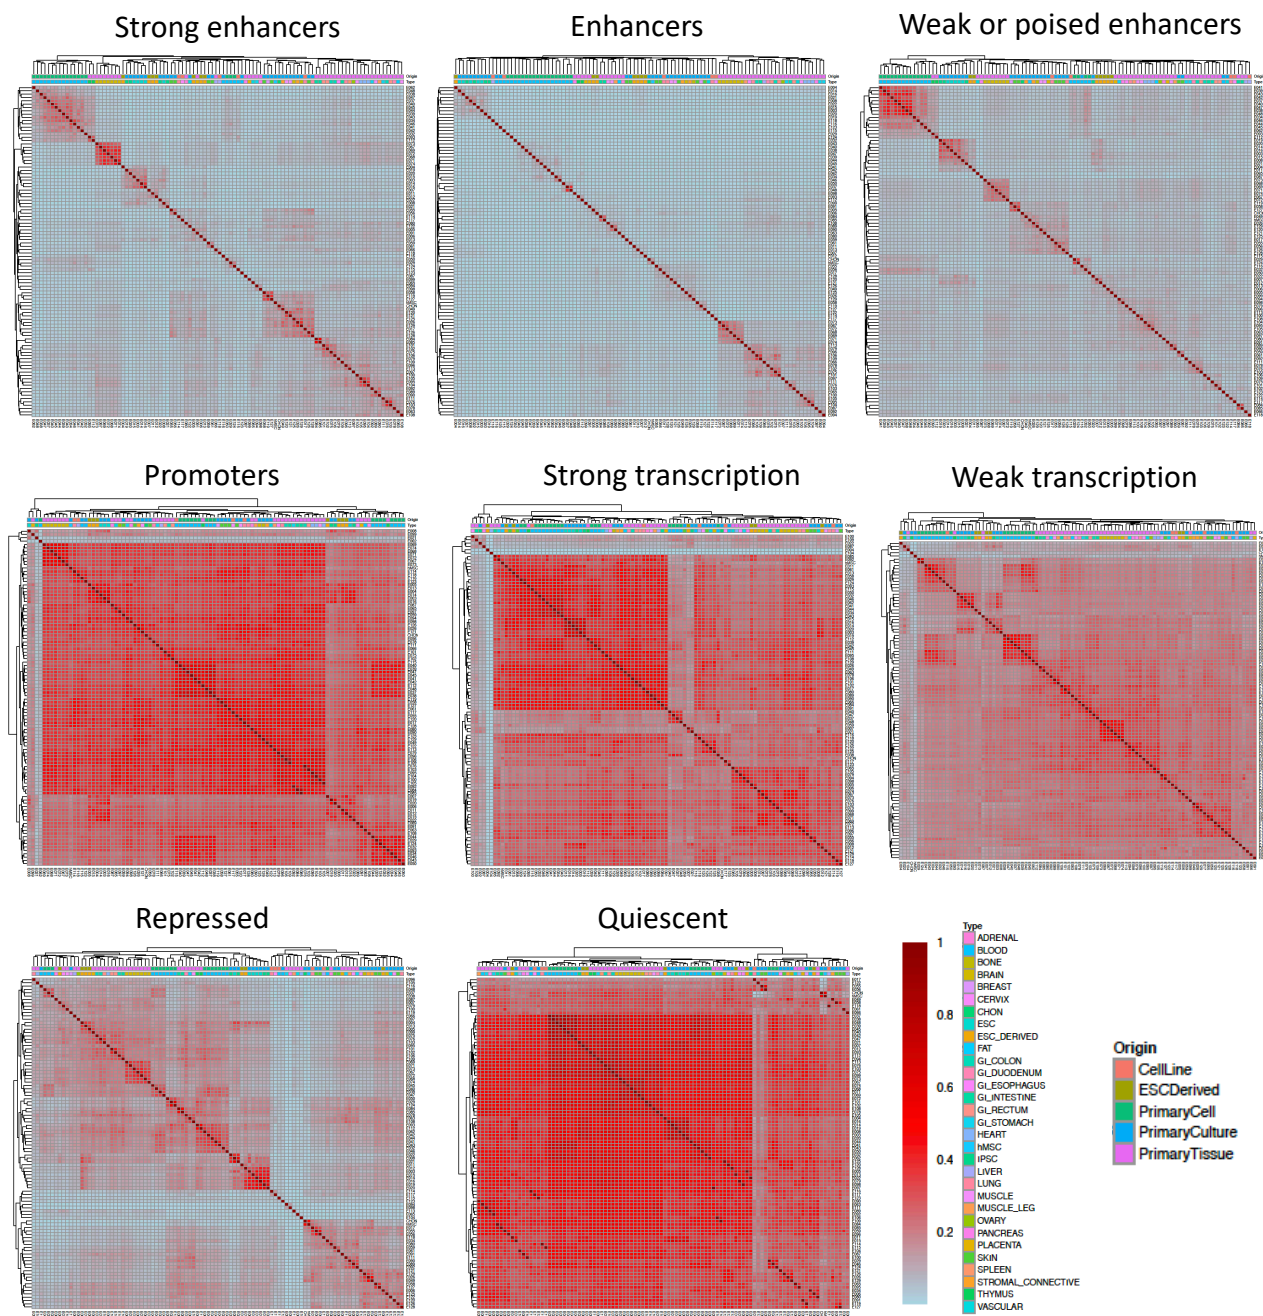

Figure S19 – Heatmaps of Jaccard similarity of cell types between equivalent chromatin states generated in this study and the Roadmap Epigenomics project. The Jaccard similarity metric ranges from 1 (identical overlap) to 0 (no overlap).



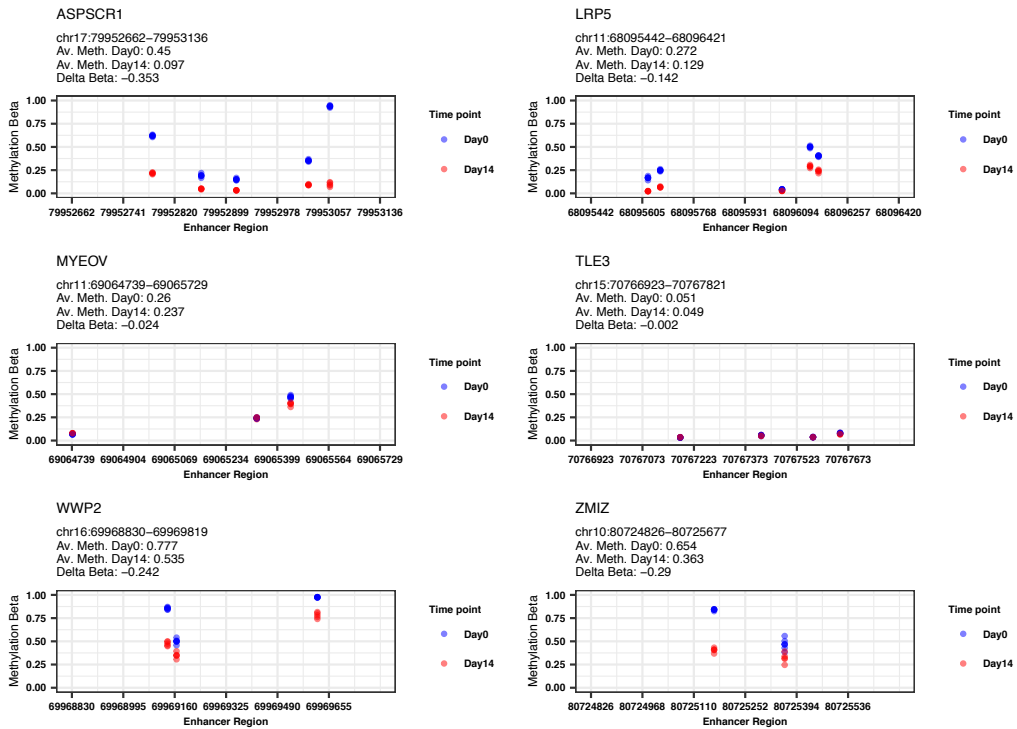

Figure S20 – Methylation in the six enhancer regions selected for luciferase reporter assays. Methylation beta values are shown on the y-axis and the CpG location within the enhancer is shown on the x-axis.

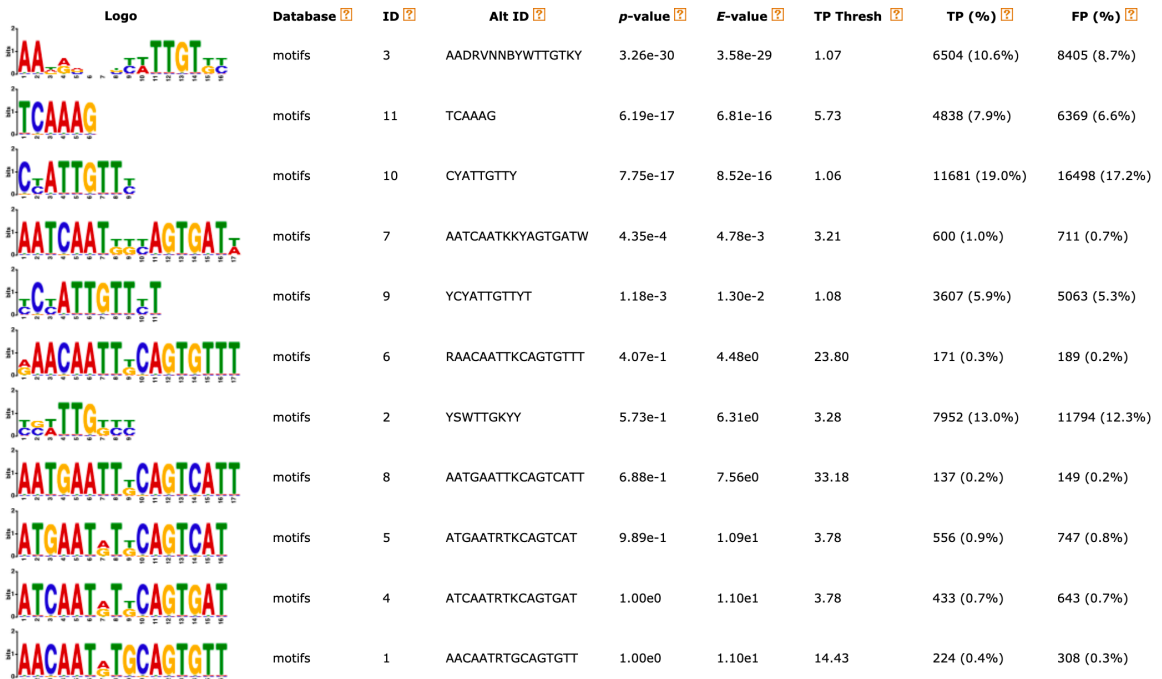

Figure S21 – Relative enrichment of SOX9 binding motifs in new enhancers to constant enhancers
